# Supplementary material
Source: PubMed Central journal article supplement (PMC10524475)
Supplement: NIHMS1889008-supplement-Supplemental_Publication_Material.pdf [file NIHMS1889008-supplement-Supplemental_Publication_Material.pdf]

**SUPPLEMENTAL MATERIAL**

1

**2 Supplemental Figures and Figure Legends**

3 Figure S1. Proportion of missing values and missing values for first cardiac magnetic  
 4 resonance study (A, B).

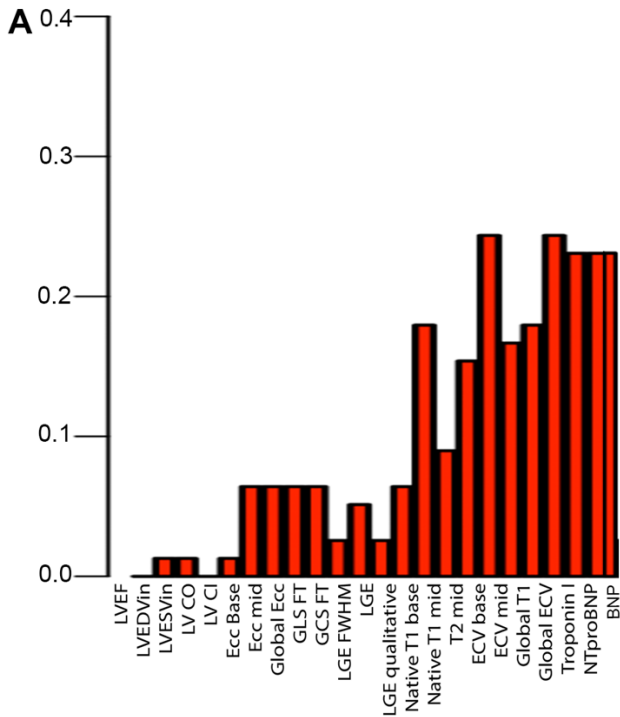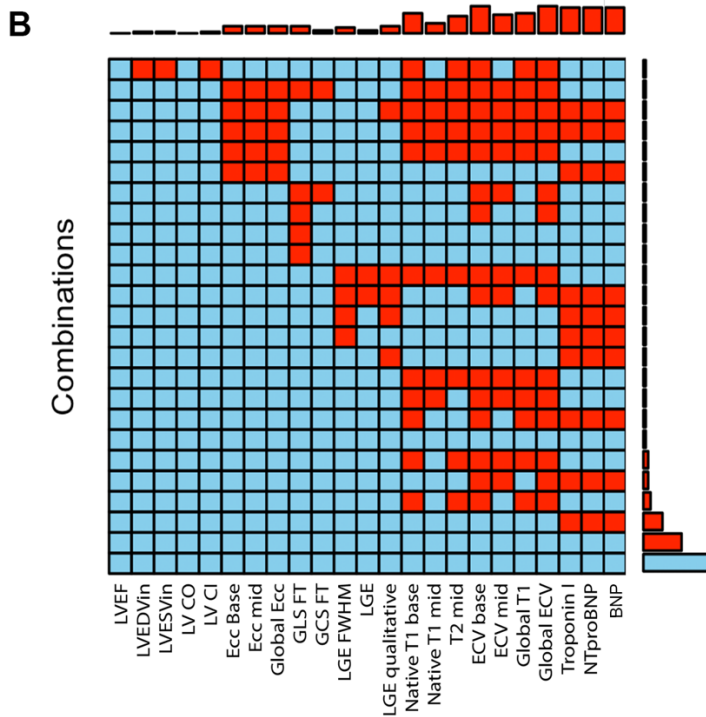

5

- 1 Figure S2. Scatterplot demonstrating age and left ventricular ejection fraction (LVEF) at
- 2 first cardiac magnetic resonance (CMR) study as well as outcome.

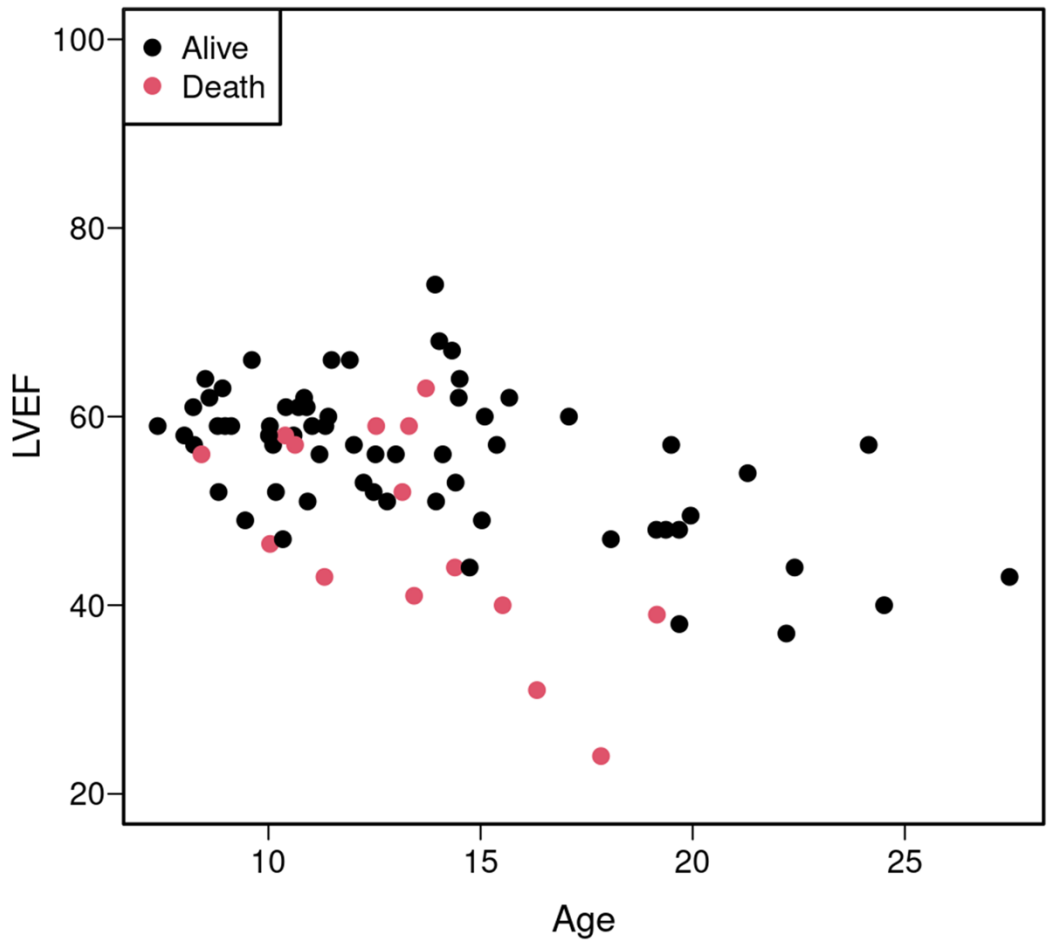

- 3
- 4

1 **Supplemental Tables**

2 Table S1: Pearson correlation between predictors of interest and skeletal muscle  
 3 strength, as measured using total indexed quantitative muscle testing (QMT).

| Measure                                                  | Correlation with total indexed QMT* | P-value |
|----------------------------------------------------------|-------------------------------------|---------|
|                                                          | 95% CI                              |         |
| Left ventricular (LV <sup>†</sup> ) ejection fraction    | 0.13<br>-0.15-0.39                  | 0.40    |
| LV end diastolic volume indexed                          | -0.01<br>-0.28-0.26                 | 0.90    |
| LV end systolic volume indexed                           | -0.07<br>-0.34-0.20                 | 0.60    |
| Global Ecc <sup>‡</sup> per 1% increase                  | -0.19<br>-0.44-0.10                 | 0.20    |
| LGE <sup>§</sup> full width half maximum per 1% increase | 0.05<br>-0.23-0.32                  | 0.70    |

4 \* QMT – quantitative muscle testing

5 † LV – left ventricle

6 ‡ Ecc – circumferential strain

7 § LGE – late gadolinium enhancement

1

Table S2: Evaluation of association between confounders of interest and all-cause mortality

| Measure                                                     | N  | N_e* | P-value |
|-------------------------------------------------------------|----|------|---------|
| Age at first cardiac magnetic resonance (CMR <sup>†</sup> ) | 78 | 15   | 0.46    |
| Ambulatory                                                  | 78 | 15   | 0.95    |
| Use of positive pressure ventilation                        | 78 | 15   | 0.80    |
| Use of corticosteroids                                      | 78 | 15   | 0.74    |
| Use of cardiac therapy                                      | 77 | 14   | 0.74    |

2 \* N\_e – number of events

3 † CMR – cardiac magnetic resonance

Table S3: Multivariable model for all-cause mortality including age as a covariate

| Measure                                                                                 | N  | Hazard Ratio<br>Confidence interval | P-value          |
|-----------------------------------------------------------------------------------------|----|-------------------------------------|------------------|
| Left ventricular (LV*) ejection fraction per<br>3% decrease                             | 78 | 1.65<br>1.33-2.05                   | <b>&lt;0.001</b> |
| Age per 1 year increase                                                                 |    | 0.26<br>0.10-0.67                   | <b>0.006</b>     |
| LV end diastolic volume indexed per<br>1.5ml/m <sup>2</sup> increase                    | 78 | 1.07<br>1.03-1.11                   | <b>&lt;0.001</b> |
| Age per 1 year increase                                                                 |    | 0.72<br>0.40-1.30                   | 0.28             |
| LV end systolic volume indexed per<br>3ml/m <sup>2</sup> increase                       | 78 | 1.37<br>1.12-1.35                   | <b>&lt;0.001</b> |
| Age per 1 year increase                                                                 |    | 0.50<br>0.25-1.0                    | <b>0.05</b>      |
| Circumferential strain (Ecc <sup>†</sup> ) at base per<br>1.7% increase (less negative) | 63 | 1.57<br>1.06-2.34                   | <b>0.024</b>     |
| Age per 1 year increase                                                                 |    | 0.52<br>0.22-1.23                   | 0.14             |
| Ecc at mid-LV per 1.1% increase (less<br>negative)                                      | 62 | 1.52<br>1.16-1.99                   | <b>0.002</b>     |
| Age per 1 year increase                                                                 |    | 0.4<br>0.14-1.09                    | 0.07             |
| Global Ecc per 1.5% increase (less<br>negative)                                         | 63 | 1.51<br>1.10-2.07                   | <b>0.012</b>     |

|                                                                 |    |           |              |
|-----------------------------------------------------------------|----|-----------|--------------|
| Age per 1 year increase                                         |    | 0.51      | 0.12         |
|                                                                 |    | 0.21-1.19 |              |
| LGE <sup>‡</sup> full width half maximum per 12% increase       | 61 | 1.55      | <b>0.005</b> |
| Age per 1 year increase                                         |    | 0.76      | 0.38         |
|                                                                 |    | 0.41-1.40 |              |
| Native T1 mid per 20ms decrease                                 | 67 | 0.95      | 0.83         |
| Age per 1 year increase                                         |    | 0.61-1.48 |              |
|                                                                 |    | 0.67      | 0.54         |
|                                                                 |    | 0.19-2.4  |              |
| N-terminal pro b-type natriuretic peptide per 50 pg/ml increase | 40 | 1.17      | <b>0.032</b> |
| Age per 1 year increase                                         |    | 0.72      | 0.45         |
|                                                                 |    | 0.31-1.69 |              |

- 1 \* LV – left ventricle
- 2 † Ecc – circumferential strain
- 3 ‡ LGE – late gadolinium enhancement
- 4

Table S4: Model for all-cause mortality based on most recent visit that included a cardiac MRI

| Measure                                                            | N  | Hazard Ratio                   | P-value          |
|--------------------------------------------------------------------|----|--------------------------------|------------------|
| Left ventricular (LV*) ejection fraction per 5% increase           | 78 | 0.69<br>0.54-0.89              | <b>&lt;0.004</b> |
| LV end diastolic volume indexed per 4ml/m2 increase                | 78 | 1.12<br>1.05-1.19              | <b>&lt;0.001</b> |
| LV end systolic volume indexed per 2ml/m2 increase                 | 78 | 1.07<br>1.03-1.10              | <b>&lt;0.001</b> |
| LV cardiac index per 1L/min/m2 increase                            | 77 | 1.01<br>0.54-1.86              | 0.98             |
| Circumferential strain (Ecc <sup>†</sup> ) at base per 1% increase | 63 | 1.2<br>1.04-1.38               | <b>0.011</b>     |
| Ecc at mid-LV per 1% increase                                      | 62 | 1.16<br>1.04-1.30              | <b>0.009</b>     |
| Global Ecc per 1% increase                                         | 63 | 1.17<br>1.04-1.31              | <b>0.001</b>     |
| Presence of late gadolinium enhancement (LGE <sup>‡</sup> )        | 72 | 451<br>0-1.05x10 <sup>23</sup> | 0.800            |
| LGE global severity score per 1 unit increase                      | 69 | 1.53<br>0.90-2.61              | 0.120            |
| LGE full width half maximum per 1% increase                        | 61 | 1.00<br>0.95-1.04              | 0.850            |

|                                                                    |    |                   |             |
|--------------------------------------------------------------------|----|-------------------|-------------|
| Native T1 mid per 1ms increase                                     | 67 | 1.00<br>0.99-1.01 | 0.580       |
| T2 mid per 1ms increase                                            | 60 | 1.08<br>0.85-1.36 | 0.540       |
| Extracellular volume mid-LV per 1% increase                        | 58 | 1.07<br>0.96-1.20 | 0.200       |
| Brain natriuretic peptide per 1pg/ml increase                      | 41 | 1.01<br>0.99-1.01 | 0.160       |
| N-terminal pro b-type natriuretic peptide per 50<br>pg/ml increase | 40 | 1.18<br>1.00-1.39 | <b>0.03</b> |
| Troponin I per 1pg/ml increase                                     | 40 | 1.00<br>0.99-1.00 | 0.450       |

1 \* LV – left ventricle

2 † Ecc – circumferential strain

3 ‡ LGE – late gadolinium enhancement
